# Supplementary material for: Fecal diversion does not support healing of anus-near pressure ulcers in patients with spinal cord injury—results of a retrospective cohort study
Source: PubMed Central journal article supplement (PMC9209324; doi:10.1038/s41393-021-00717-2), 2021-10-07
Supplement: 41393_2021_717_MOESM1_ESM.pdf [file 41393_2021_717_MOESM1_ESM.pdf]

**Table 1-S: Classification of the severity of complications.**

| Scale   | Definition                                                                                                                                                                                                                                                                                                                                                                                                                                                                                                                      |
|---------|---------------------------------------------------------------------------------------------------------------------------------------------------------------------------------------------------------------------------------------------------------------------------------------------------------------------------------------------------------------------------------------------------------------------------------------------------------------------------------------------------------------------------------|
| Stage 1 | <ul style="list-style-type: none"><li>· Bloody-serous secretion from the wound</li><li>· Mild secretion from the wound</li><li>· Ulcer</li><li>· Pronounced scarring due to flap-plastic covering of the ulcer</li><li>· Fibrinous evidence</li><li>· Urinary tract infection</li><li>· Anemia</li><li>· Hematoma</li><li>· Hematoma by Xarelto</li><li>· Deterioration of laboratory parameters</li><li>· Fever</li><li>· Constipation</li><li>· Transplanted split skin partially detached (treated conservatively)</li></ul> |

Stage 2

- Wound healing disorder
- Greatly delayed wound healing
- Wound healing disorder due to massive diarrhea
- Tearing of the scar after mobilization
- Arrosion in the scar
- Recurrence
- Partial dehiscence of the scar and dislocation of the embedded redon drainage
- Wound dehiscence and postoperative anemia
- Wound dehiscence with fistula formation
- Hemorrhage with wound dehiscence
- Remaining highly secreting fistula
- New epithelial lesions and persistent inflammation
- Candida intertrigo inguinal spread to surgical wound
- Urinary tract infection with fever and chills
- Urinary tract infection with Proteus mirabilis (3MRGN)
- Postoperative local infection
- MRSA
- Superinfection 3MRGN
- Superinfection 4MRGN
- Superinfection 3MRGN and 4MRGN
- Allergic to antibiotics
- Fluid retention
- Postoperative desaturation
- Abdominal discomfort and bacterial conjunctivitis
- Pointed hemorrhage right ischial seat and UTI with Pseudomonas aeruginosa (3MRGN)
- Lymphedema
- Ulnar nerve syndrome
- Dehiscence with fistula formation and feverish UTI
- Severe AB-associated diarrhea and wound dehiscence
- Wound healing disorder and MRSA
- Wound dehiscence and postoperative anemia and necrosis
- Re-education of necrosis
- Suture necrosis with suture insufficiency
- Wound healing disorder and infection
- Abscess formation
- Ischial pressure ulcer stage 2 after surgery

Stage 3

- Postoperative pneumothorax
- Postoperative delirium
- Convulsive seizures in the course
- Non-neurological convulsive seizures
- Psychosis
- Reopening of the wound by traction and hemoptysis
- Postoperative thrombosis
- Deep leg vein thrombosis
- Neuropathic pain and abdominal pains
- Delayed wound healing with scar carcinoma and squamous cell carcinoma
- Wound healing disorder with necrosis and MRSA
- Bleeding

Stage 4

- Respiratory insufficiency with intubation in intensive care
- Postoperative pneumonia
- Postoperative pulmonary embolism
- Wound healing disorder and postoperative bleeding anemia
- Relocation of the right main bronchus, as well as clostridia-associated diarrhea and reanimation required for pneumothorax
- Postoperative systemic infection
- Septic shock
- Sepsis and allergic reactions to Octenisept and Imipenem as well as dehiscence and hemothorax
- Cardiopulmonary decompensation
- Cardiac deterioration
- Media Part infarction
- Pancreatitis with cholecystitis and UTI
- Agranulocytosis by beta-lactams
- Postoperative arterial bleeding with neutropenia and dehiscence
- Allergy to antibiotics and ileus
- Necrotizing fasciitis made wound healing difficult
- Catecholamine decrease and endotracheal intubation
- Palliative

Stage 5

- Endotracheal intubation with pneumonia and death
  - Bleeding with necrosis and death
  - General deterioration with renal insufficiency leading to death
  - Brain hemorrhage with fatal consequences
  - Postoperative intracranial hemorrhage with death
  - Resuscitation and death by acute liver failure in cirrhosis
  - Through-syndrome and cardio-pulmonary poor and occurrence of further decubitus at agitation and ultimately death
  - Circulatory failure and death
  - Septic anemia with fatal consequences
  - Death by sepsis
-

**Table 2-S: Baseline characteristics.**

|                                           | <b>n</b> | <b>Number (%) or Median (IQR)<sup>+</sup></b> |
|-------------------------------------------|----------|-----------------------------------------------|
| <b>Gender [female]</b>                    | 463      | 111 (24.0)                                    |
| <b>Age [years]</b>                        | 462      | 53.0 (43; 64)                                 |
| <b>Body mass index [kg/m<sup>2</sup>]</b> | 452      | 24.6 (21; 28)                                 |
| <b>Duration since SCI [months]</b>        | 405      | 222 (75.5; 382)                               |
| <b>Aetiology of SCI</b>                   | 430      |                                               |
| Trauma                                    |          | 281 (60.7)                                    |
| Infection                                 |          | 12 (2.6)                                      |
| Neoplasia                                 |          | 13 (2.8)                                      |
| Other <sup>++</sup>                       |          | 124 (26.8)                                    |
| <b>ASIA Impairment Scale</b>              | 451      |                                               |
| A                                         |          | 402 (89.1)                                    |
| B                                         |          | 49 (10.9)                                     |
| <b>Comorbidities</b>                      | 462      | 405 (87.7)                                    |
| <b>Smoking habit</b>                      | 406      |                                               |
| Smoker                                    |          | 105 (22.7)                                    |
| Non-smoker/former smoker                  |          | 301 (65.0)                                    |
| <b>Alcohol consumption</b>                | 463      | 30 (6.5)                                      |
| <b>ASA classification<sup>+++</sup></b>   | 463      |                                               |
| Stage 1                                   |          | 0 (0)                                         |
| Stage 2                                   |          | 212 (45.8)                                    |
| Stage 3                                   |          | 245 (52.9)                                    |
| Stage 4                                   |          | 6 (1.3)                                       |
| Stage 5                                   |          | 0 (0)                                         |
| <b>Presence of a stoma</b>                | 463      | 71 (15.3)                                     |

ASA: American Society of Anesthesia. ASIA: American Spinal Injury Association. SCI: Spinal cord injury. +: As appropriate. ++: Neurological diseases, such as multiple sclerosis or spina bifida. +++: Regardless of SCI.

**Table 3-S: Comorbidities.**

| <b>Comorbidity</b> | <b>n</b> | <b>Total cohort<br/>n (%)</b> | <b>Fecal diversion<br/>group<br/>n = 71</b> | <b>Supported natural<br/>defecation group<br/>n = 391</b> | <b>p-value</b> |
|--------------------|----------|-------------------------------|---------------------------------------------|-----------------------------------------------------------|----------------|
| Gastrointestinal   | 462      | 68 (14.7)                     | 11 (15.5)                                   | 57 (14.5)                                                 | 0.84           |
| Heart              | 462      | 69 (14.9)                     | 12 (16.9)                                   | 57 (14.5)                                                 | 0.61           |
| Lung               | 462      | 76 (16.5)                     | 12 (16.9)                                   | 64 (16.4)                                                 | 0.91           |
| Hepatic            | 462      | 19 (4.1)                      | 5 (7.0)                                     | 14 (3.6)                                                  | 0.18           |
| Renal              | 462      | 61 (13.2)                     | 13 (18.3)                                   | 48 (12.3)                                                 | 0.17           |
| Endocrine          | 462      | 102 (22.1)                    | 20 (28.2)                                   | 82 (21.0)                                                 | 0.18           |
| Neurological       | 462      | 62 (13.4)                     | 13 (18.3)                                   | 49 (12.5)                                                 | 0.19           |
| Psychiatric        | 462      | 83 (18.0)                     | 11 (15.5)                                   | 72 (18.4)                                                 | 0.56           |
| Others*            | 462      | 336 (72.7)                    | 56 (78.9)                                   | 280 (71.6)                                                | 0.21           |

\*Urinary tract infection, peripheral artery disease, deep vein thrombosis, hypertension, anemia ...

**Table 4-S: Medication.**

| Drug class               | n   | Total cohort<br>n (%) | Fecal diversion<br>group | Supported natural<br>defecation group | p-value |
|--------------------------|-----|-----------------------|--------------------------|---------------------------------------|---------|
| Analgetics (Non-Opioids) | 459 | 112 (24.4)            | 21 (29.6)                | 91 (23.5)                             | 0.27    |
| Opioids                  | 460 | 64 (13.9)             | 6 (8.5)                  | 58 (14.9)                             | 0.15    |
| Laxatives (osmotic)      | 460 | 111 (24.1)            | 18 (25.4)                | 93 (23.9)                             | 0.79    |
| Other Laxatives          | 460 | 75 (16.3)             | 8 (11.3)                 | 67 (17.2)                             | 0.21    |
| Klysma                   | 460 | 50 (10.9)             | 3 (4.2)                  | 47 (12.1)                             | 0.05    |
| Baclofen                 | 460 | 173 (37.6)            | 24 (33.8)                | 149 (38.3)                            | 0.47    |
| Prokinetics              | 459 | 25 (5.4)              | 3 (4.2)                  | 22 (5.7)                              | 0.62    |
| Probiotics               | 459 | 107 (23.3)            | 14 (19.7)                | 93 (24.0)                             | 0.55    |
| Anticholinergics         | 461 | 217 (47.1)            | 33 (46.5)                | 184 (47.2)                            | 0.91    |

\*: Significant with  $p < 0.05$ . \*\*: Significant with  $p < 0.01$ .

**Table 5-S: Laboratory parameters.**

|                |           | Number (%) or Median (IQR) <sup>+</sup> |                       |                                    |                       |
|----------------|-----------|-----------------------------------------|-----------------------|------------------------------------|-----------------------|
|                |           | n                                       | Fecal diversion group | Supported natural defecation group | p-value <sup>++</sup> |
| Before surgery | RBC       | 458 (68/390)                            | 10.9 (9.1; 12.2)**    | 12.1 (10.5; 13.6)                  | 0.00005               |
|                | WBC       | 458 (68/390)                            | 8.8 (7.1; 11.6)       | 9.8 (7.6; 13.1)                    | 0.12                  |
|                | Platelets | 457 (68/389)                            | 339.5 (267.8; 496.3)  | 330 (245; 428)                     | 0.12                  |
|                | CRP       | 458 (68/390)                            | 7.8 (3.1; 14)         | 7.9 (2.4; 17)                      | 0.97                  |
| At discharge   | RBC       | 444 (69/375)                            | 11.2 (10.4; 13.1)**   | 12.2 (10.9; 13.6)                  | 0.007                 |
|                | WBC       | 443 (69/374)                            | 7.1 (5.8; 8.9)        | 7.1 (5.6; 8.7)                     | 0.67                  |
|                | Platelets | 443 (69/374)                            | 261 (191.5; 331)      | 252.5 (198; 308.5)                 | 0.92                  |
|                | CRP       | 444 (69/375)                            | 1.7 (0.6; 4.4)*       | 1.2 (0.4; 2.8)                     | 0.02                  |

RBC: Red blood cell count, WBC: White blood cell count, CRP: C-reactive protein. +: As appropriate. ++: Chi2 Test or Mann–Whitney U test, as appropriate. \*: Significant with  $p < 0.05$ . \*\*: Significant with  $p < 0.01$ .

**Table 6-S: Stoma characteristics.**

|                                                              | <b>n</b> | <b>Number (%) or Median (IQR)<sup>+</sup></b> |
|--------------------------------------------------------------|----------|-----------------------------------------------|
| <b>Presence of a stoma</b>                                   | 71       | 71 (100)                                      |
| End colostomy                                                |          | 26 (36.6)                                     |
| Loop ileostomy                                               |          | 17 (23.9)                                     |
| Unknown                                                      |          | 28 (39.4)                                     |
| <b>Time between stoma surgery and current ulcer [months]</b> | 29       | 40 (2.3; 156.1)                               |
| <b>Adverse event during stoma surgery*</b>                   | 44       | 11 (25)                                       |

+: As appropriate. \*Kind of adverse events: Perforation of the colon, wound infection, suture insufficiency, tear out the stoma, wound healing disorder in the area of the abdominal wall, recurrent stoma complications, acute abdomen, sepsis, sigma elongatum, ileus.



**Table 7-S: Ulcer characteristics.**

| <b>Parameter</b>                                      | <b>n</b> | <b>Number (%) or Median (IQR)<sup>+</sup></b> |
|-------------------------------------------------------|----------|-----------------------------------------------|
| <b>Size [cm<sup>2</sup>]</b>                          | 332      | 16.0 (8.0; 30.0)                              |
| <b>Severity</b>                                       | 463      |                                               |
| Stage 2                                               |          | 0 (0)                                         |
| Stage 3                                               |          | 291 (62.9)                                    |
| Stage 4                                               |          | 172 (37.1)                                    |
| <b>Previous surgery</b>                               | 463      | 246 (53.1)                                    |
| Number of surgical procedures ≤ 3                     |          | 201 (81.7)                                    |
| Number of surgical procedures > 3                     |          | 45 (18.3)                                     |
| <b>Admission to surgery time [days]</b>               | 240      | 60 (27.3; 140)                                |
| <b>Primary microbial infection</b>                    | 463      | 434 (93.7)                                    |
| <b>Microbial superinfection</b>                       | 463      | 95 (20.5)                                     |
| <b>Time until complete cure [days]</b>                | 445      | 61 (44; 89)                                   |
| <b>Length of hospital stay [days]</b>                 | 461      | 60 (44; 89.5)                                 |
| <b>Length of ICU stay [days]</b>                      | 463      | 4 (2.75; 22)                                  |
| <b>Adverse events [Ulcer]</b>                         | 463      | 245 (53.9)                                    |
| <b>Adverse events in total</b>                        | 463      | 269 (58.1)                                    |
| <b>Recurrence [within 3 months]</b>                   | 463      | 30 (6.5)                                      |
| <b>New ulcer in the same region [within 3 months]</b> | 463      | 13 (2.8)                                      |

ICU: Intensive care unit. +: As appropriate.

**Figure 1-S: Comorbidities of the fecal diversion and supported natural defecation group were not significant.**

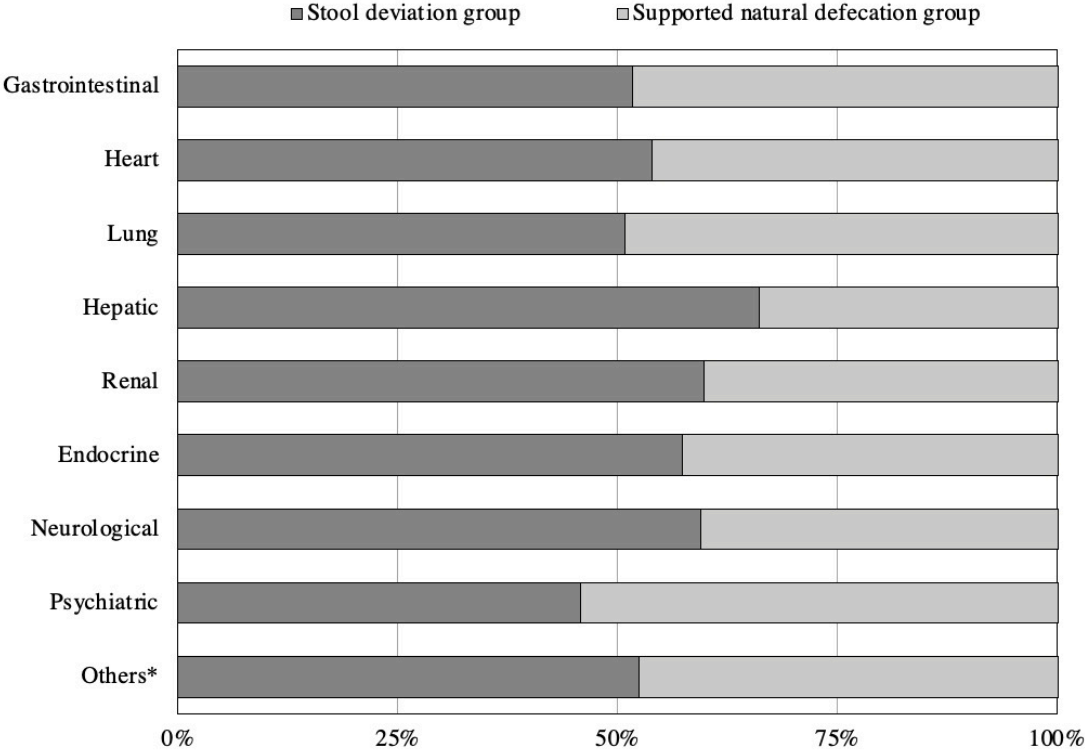

\*Urinary tract infection, peripheral artery disease, deep vein thrombosis, hypertension, anemia, etc.

**Figure 2-S: ASA stage 3 and 4 were highly significant in patients with fecal diversion.**

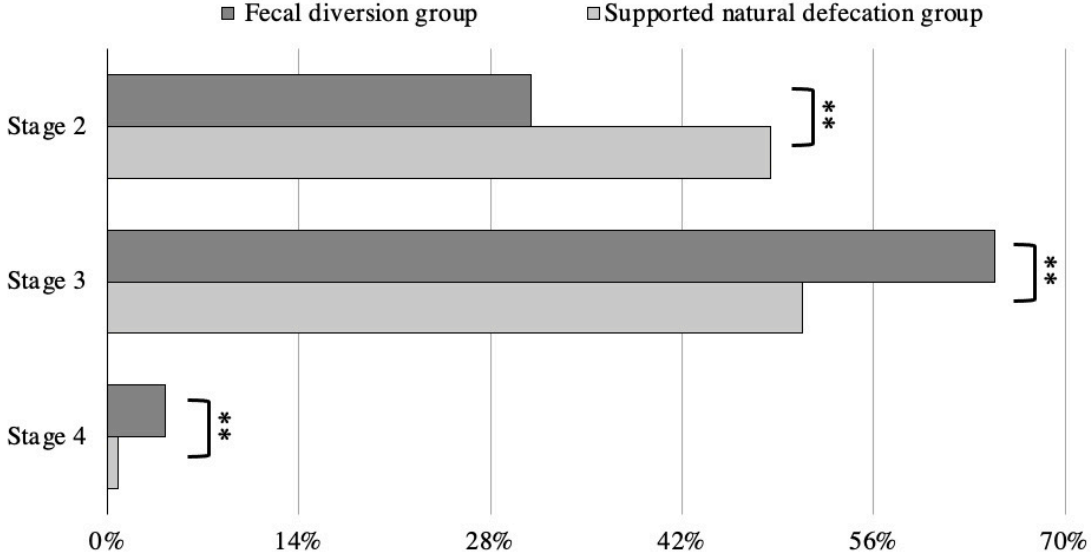

(\*\*p < 0.01). Stage 3 was significant in the natural defecation group (\*p < 0.05).
